## Delivering a RAS protease halts tumor growth

Vania Vidimar, Roman A. Melnyk and Karla J.F. Satchell

**Comment on:** Vidimar V, et al. A novel engineered chimeric toxin that cleaves activated mutant and wild-type RAS inhibits tumor growth. *Proc Natl Acad Sci U S A.* 2020; 117:16938–16948. <https://doi.org/10.1073/pnas.2000312117>. [PubMed]

More than one-third of all human cancers are driven by mutations in *RAS* genes, which were among the first oncogenes discovered about four decades ago. *RAS* genes (*H-*, *N-*, and *KRAS*) encode small membrane-associated GTPases that act as central molecular switches in signaling networks involved in differentiation, proliferation and survival. Because of their role and impact on cancer, RAS proteins are among the most coveted pharmacological targets for cancer therapy. However, the high affinity for GTP and lack of accessible drug-binding pockets have made anti-RAS drug design difficult and RAS proteins have been historically considered undruggable. Currently, there are no FDA-approved therapies against RAS in the clinic [1]. Yet recently, there has been a renewed interest in tackling RAS directly, with at least four inhibitors that target KRAS G12C under evaluation in Phase I or Phase II clinical trials [2]. However, clinical benefits with these molecules are restricted to patients with KRAS G12C-driven tumors, which account for < 14% of all KRAS cancers. Thus, additional efforts are needed to identify effective inhibitors that target the major RAS oncoproteins as well as aberrantly overactivated wild-type RAS proteins so that a larger pool of patients with cancer, and particularly RAS-driven cancers, can benefit.

Bacterial toxins are known to exhibit high specificity for their host intracellular targets, which are primarily proteins and central regulators of signal transduction such as small GTPases. Indeed, the bacterial RAS-RAP1 specific endopeptidase (RRSP) specifically cleaves both active and inactive RAS and RAP1, leaving other closely related members of the RAS family unaffected [3–5]. In addition, polymorphic toxins such as diphtheria toxin can be disarmed of the catalytically active domain and the remaining domains employed as transduction platforms to deliver bioactive proteins via a receptor-binding mechanism [6]. This receptor-mediated delivery is highly important because the principle underlying targeted cancer therapy takes advantage of cancer-specific cell surface molecules as recognition sites for selective targeting and elimination of neoplastic cells, while sparing healthy cells. In our recent paper published in the *Proc. Natl. Acad. Sci. USA*, we described the development of a biologic chimeric toxin comprising RRSP fused to the translocation and receptor-binding domains of diphtheria toxin ( $DT_B$ ) [7]. We showed that  $DT_B$  specifically and efficiently delivers RRSP to cancer cell lines bearing the diphtheria toxin receptor HB-EGF and then abrogates cell viability and proliferation at concentrations as low as one picomolar.

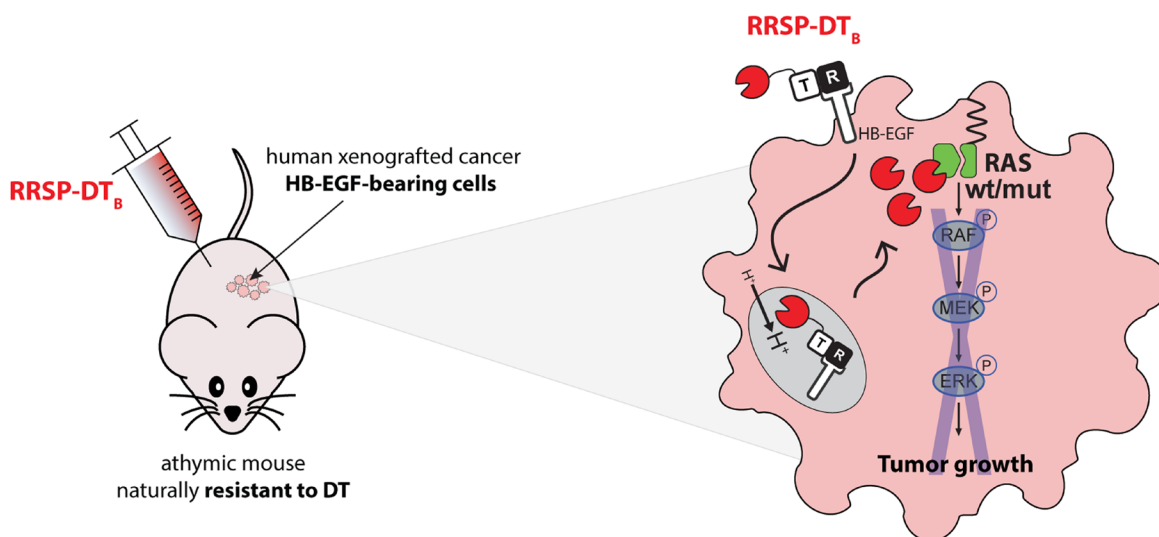

**Figure 1: Schematic illustration depicting simplified delivery of RRSP to xenografted HB-EGF-bearing cancer cells in mice via  $DT_B$ .** The  $DT_B$  receptor R domain recognizes HB-EGF on the surface of xenografted human cancer cells in athymic mice and the all complex is internalized into intracellular endosomes. Following acidification of the endosomal compartments, the translocation T domain of  $DT_B$  allows release of RRSP into the cytosol, where RRSP engages and cleaves RAS at the membrane, thereby ablating downstream RAS signaling and ultimately halting tumor growth.

Assessment of the efficacy of this toxin to inhibit cell growth across the entire NCI-60 panel revealed that nearly all cancer lines tested were susceptible to RRSP-DT<sub>B</sub>. Those classified as most susceptible to RRSP-DT<sub>B</sub> commonly have genomic abnormalities in *RAS* genes.

Because mice are naturally resistant to diphtheria toxin, its administration does not cause toxicity and thus the DT<sub>B</sub> portion of the chimeric toxin functions as a human cancer cell specific targeting strategy in mice. We showed that athymic nude mice did not experience toxicity at the doses of RRSP-DT<sub>B</sub> employed and RRSP was released via DT<sub>B</sub> only to the xenografted HB-EGF-expressing human cancer cells, leading to specific RAS target engagement and reduced growth in tumors driven by either wild-type or mutant RAS (Figure 1). Moreover, due to the modularity of DT<sub>B</sub>, improved tumor-selective targeting can be achieved by replacing the receptor-binding domain of DT<sub>B</sub> with other binding moieties, such as interleukin-2 (IL-2), so that cancer cells overexpressing the IL-2 receptor (IL-2R) can be more efficiently targeted by RRSP-DTT-IL2.

This work established the potential for use of RRSP as a therapeutic to reduce tumorigenesis and for the translocation component of diphtheria toxin to transfer cargoes into cancer cells *in vivo*. The pairing of these toxin components in RRSP-DT<sub>B</sub> shows efficacy to treat *in vivo* models of RAS-driven tumors. For therapeutic purposes, development of a human-tailored, targeted delivery of RRSP to cancer cells is planned in order to limit any on-target off-tumor toxicity. For the DT<sub>B</sub>-based platform to be used as the ultimate delivery strategy, common DT<sub>B</sub> epitopes need to be modified in order to circumvent immunogenicity, while retaining translocation functions. In addition, DT<sub>B</sub> can be modified in a cassette fashion to target cancer specific receptors. Alternative possibilities include packaging RRSP or RRSP-DT<sub>B</sub> into ligand-targeted carriers for assisted delivery of RRSP to cancer cells that selectively express or overexpress specific receptors. Our work provides evidence of the *in vivo* anticancer effect of a bacterial toxin with built-in RAS proteolytically activity. We envision that further efforts towards finding a delivery system for RRSP with

more translatable impact may take anti-RAS therapy to the next level.

## CONFLICTS OF INTEREST

Authors have no conflicts of interest to declare.

**Vania Vidimar:** Department of Microbiology-Immunology, Feinberg School of Medicine, Northwestern University, Chicago, Illinois, USA

**Correspondence to:** Vania Vidimar,  
**email** [vania.vidimar@northwestern.edu](mailto:vania.vidimar@northwestern.edu)

**Keywords:** RAS; RRSP; chimeric toxins; cancer; xenografts

**Received:** August 06, 2020

**Published:** September 01, 2020

## REFERENCES

1. Papke B, et al. *Science*. 2017; 355:1158–63. <https://doi.org/10.1126/science.aam7622>. [PubMed]
2. Dienstmann R, et al. *Gastroenterology*. 2020; 158:806–11. <https://doi.org/10.1053/j.gastro.2019.12.051>. [PubMed]
3. Antic I, et al. *Nat Commun*. 2015; 6:7396. <https://doi.org/10.1038/ncomms8396>. [PubMed]
4. Biancucci M, et al. *Biochemistry*. 2017; 56:2747–57. <https://doi.org/10.1021/acs.biochem.7b00246>. [PubMed]
5. Biancucci M, et al. *Sci Signal*. 2018; 11:eaat8335. <https://doi.org/10.1126/scisignal.aat8335>. [PubMed]
6. Auger A, et al. *Mol Pharm*. 2015; 12:2962–71. <https://doi.org/10.1021/acs.molpharmaceut.5b00233>. [PubMed]
7. Vidimar V, et al. *Proc Natl Acad Sci U S A*. 2020; 117:16938–16948. <https://doi.org/10.1073/pnas.2000312117>. [PubMed]

**Copyright:** Vidimar et al. This is an open-access article distributed under the terms of the Creative Commons Attribution License 3.0 (CC BY 3.0), which permits unrestricted use, distribution, and reproduction in any medium, provided the original author and source are credited.
